# Supplementary material for: HTR7&nbsp;Promotes Laryngeal Cancer Growth Through Activating PI3K/AKT&nbsp;Pathway
Source: Research Square preprint supplement (doi:10.21203/rs.3.rs-139870/v1), 2021-01-07
Supplement: Supplementary file 1 [file f680b86953e0613b47df2469.docx]

**Supplemental Table 1. Clinicopathological Characteristics of Studied Patients and Expression of HTR7 in Laryngeal Cancer**

| Characteristics | No. of Cases |
| --- | --- |
| **Age (years)** |  |
| < 55 | 27 |
| ≥ 55 | 86 |
| **Gender** |  |
| Male | 106 |
| Female | 7 |
| **T stage** |  |
| T1 | 52 |
| T2 | 7 |
| T3 | 28 |
| T4 | 26 |
| **N stage** |  |
| N0 | 85 |
| N1 | 20 |
| N2 | 7 |
| N3  **M stage** | 1 |
| M0 | 103 |
| M1 | 10 |
| **Clinical stage** |  |
| I | 38 |
| II | 16 |
| III | 27 |
| IV | 32 |
| **Thyroid cartilage invasion** |  |
| Yes | 25 |
| No | 88 |
| **Status (at follow-up)** |  |
| Alive | 94 |
| Death because of laryngeal cancer | 19 |
| Death because of other than laryngeal cancer | 0 |
| **HTR7 expression** |  |
| Negative | 1 |
| Positive | 112 |
| Low expression | 61 |
| High expression | 52 |
